## **Pulmonary *FABP4* is an inverse biomarker of pneumonia in critically ill children and adults**

\*Emily C. Lydon<sup>1</sup>, \*Hoang Van Phan<sup>1</sup>, Eran Mick<sup>1,2,3</sup>, Natasha Spottiswoode<sup>1</sup>, Carolyn S. Calfee<sup>3</sup>, Peter M. Mourani<sup>4</sup>, Charles R. Langelier<sup>1,2</sup>

\*equal contributions

<sup>1</sup>Division of Infectious Diseases, University of California, San Francisco, CA, USA

<sup>2</sup>Chan Zuckerberg Biohub San Francisco, San Francisco, CA, USA

<sup>3</sup>Division of Pulmonary and Critical Care Medicine, Cardiovascular Research Institute, University of California, San Francisco, CA, USA

<sup>4</sup>Department of Pediatrics, Section of Critical Care, University of Arkansas for Medical Sciences and Arkansas Children's Hospital, Little Rock, AR, USA

### **Corresponding Author:**

Emily C. Lydon

513 Parnassus Avenue, Room S380

San Francisco, CA 94143

### **Contributions:**

CSC, PMM, CRL secured funding and designed and enrolled the clinical cohorts. ECL, CRL, PMM, CSC, and NS performed clinical adjudications for the cohorts. CRL performed RNA extractions and sequencing. EM, HVP, CRL, NS, and ECL conceived this specific project idea. HVP and EM performed data analysis and generated the figure. ECL, HVP, and CRL wrote the initial draft of the manuscript. All authors reviewed and approved the final manuscript.

### **Funding:**

5R01HL155418 (CRL, PMM); Chan Zuckerberg Biohub San Francisco (CRL); R35HL140026 (CSC); R01HL124103 (PMM)

## Abstract

Lower respiratory tract infection (LRTI) is a leading cause of mortality, yet accurate diagnosis remains challenging. We studied two prospective observational cohorts of critically ill patients with acute respiratory failure (pediatric, N=261; adult N=202) and analyzed RNA sequencing data from tracheal aspirate collected following intubation. Patients with LRTI or non-infectious acute respiratory failure were adjudicated by a multi-physician team. We found that *FABP4* expression was significantly downregulated in children with confirmed LRTI compared to those with non-infectious respiratory failure, and when incorporated into a diagnostic classifier, achieved an area under the receiver operating characteristic curve (AUC) of  $0.90 \pm 0.07$ . When tested in the adult cohort, and AUC of  $0.85 \pm 0.12$  was attained. These findings suggest that pulmonary *FABP4* could serve as a valuable biomarker for the early diagnosis of LRTI in critically ill patients across the age spectrum, offering a potential tool for improving clinical outcomes and reducing unnecessary antibiotic use.

## 2 Manuscript

3 Lower respiratory tract infection (LRTI) is a leading cause of death worldwide, yet  
4 the diagnosis is often challenging since non-infectious respiratory processes can present  
5 similarly. Furthermore, existing culture-based microbiologic testing is time-consuming,  
6 can return falsely negative with preceding antibiotics, and may identify microbes unrelated  
7 to a pulmonary infection. Consequently, clinicians often turn to rapid host response-based  
8 peripheral blood biomarkers, such as procalcitonin and C-reactive protein (CRP), for  
9 gauging LRTI suspicion and deciding to initiate empiric antibiotics. Procalcitonin has  
10 some utility in distinguishing bacterial and viral etiologies of LRTI, but diagnostic  
11 performance is limited in critically ill patients, and CRP performs worse.(1,2) Presently,  
12 no clinically available host biomarkers accurately distinguish all-cause LRTI from non-  
13 infectious respiratory illness.

14 To address the need for better LRTI diagnostics, we previously utilized respiratory  
15 metatranscriptomics to build multi-gene host classifiers that accurately differentiate LRTI  
16 from non-infectious acute respiratory syndromes in critically ill adults and children. These  
17 classifiers achieved remarkable accuracy, both when used on their own and when  
18 integrated with microbial detection.(3,4) While promising, the practical complexities of  
19 RNA sequencing precludes immediate implementation in many clinical settings. We  
20 therefore sought to identify whether a single gene could accurately diagnose LRTI in  
21 patients with acute respiratory failure.

22 We first evaluated a recently described(4) prospective multicenter cohort of 261  
23 critically ill children with acute respiratory failure (Table 1). Transcriptional profiling was  
24 performed on tracheal aspirate (TA) samples collected <24 hours after intubation using

25 previously described methods.(4) Retrospective clinical adjudication classified subjects  
26 into four LRTI groups: Definite (clinical LRTI diagnosis with compatible microbiology,  
27 n=117), Suspected (clinical LRTI diagnosis with negative microbiology, n=57),  
28 Indeterminate (clinical uncertainty regarding LRTI, n=37), and No Evidence (clear non-  
29 infectious etiology with negative microbiology, n=50). Most Definite LRTI cases were viral,  
30 reflecting the typical microbiology of pediatric community-acquired LRTI.(5) Etiologies of  
31 non-infectious respiratory failure included seizures, trauma, airway abnormalities, and  
32 ingestion. Differential gene expression analysis between Definite and No Evidence  
33 subjects identified 4,718 genes at a Benjamini-Hochberg adjusted p-value ( $P_{adj}$ )<0.05,  
34 with the gene fatty acid-binding protein 4 (*FABP4*) emerging as the most promising  
35 candidate biomarker ( $P_{adj}$ <0.0001) (Figure 1A). Five-fold cross-validation on normalized  
36 *FABP4* gene expression in the Definite and No Evidence groups yielded an area under  
37 the receiver operator curve (AUC) of  $0.90\pm 0.07$  for diagnosing LRTI, equating to a  
38 sensitivity of  $86\pm 7\%$  and specificity of  $90\pm 7\%$  at Youden's index (Figure 1B). *FABP4*  
39 classified 73.7% of the Suspected group and 54.1% of the Indeterminate group as LRTI,  
40 aligning with stronger suspicion of LRTI in the former.

41         Given that LRTI microbiology and immune responses vary with age, it was  
42 uncertain whether *FABP4* would perform as well in diagnosing adult LRTI. We therefore  
43 assessed *FABP4* expression in an independent prospective cohort of 202 adults requiring  
44 intubation for acute respiratory failure (Table 1).(3) A similar retrospective clinical LRTI  
45 adjudication approach identified 44 Definite, 36 Suspected, 66 Indeterminate, and 56 No  
46 Evidence subjects. In contrast to the pediatric cohort, the adult Definite subjects had  
47 predominantly bacterial LRTI and included subjects with both hospital-acquired and

48 community-acquired pneumonia. Etiologies of non-infectious respiratory failure included  
49 cardiac disease, neurologic syndromes, and primary pulmonary processes (e.g., COPD,  
50 ILD, pulmonary embolism). Utilizing transcriptional profiling of TA samples collected <72  
51 hours after intubation, we compared *FABP4* gene expression across LRTI status. *FABP4*  
52 exhibited a similarly striking decrease in expression in adults with Definite LRTI compared  
53 to No Evidence ( $P_{\text{adj}} < 0.0001$ ) and achieved an AUC of  $0.85 \pm 0.12$  when used as a  
54 diagnostic classifier in these two groups (Figure 1). Similar to the pediatric cohort, *FABP4*  
55 predicted LRTI in 66.7% of the Suspected group and 31.8% of the Indeterminate group.

56 So what is *FABP4*, and why might it be downregulated in LRTI? Fatty-acid binding  
57 proteins are a family of intracellular proteins that regulate fatty acid trafficking and  
58 signaling.(6) In the lung, *FABP4* is considered a marker of tissue-resident alveolar  
59 macrophages, and severe SARS-CoV-2 infection has recently been shown to drastically  
60 deplete the *FABP4*-expressing alveolar macrophage population.(7,8) Prior studies have  
61 also linked increased *FABP4* levels to non-infectious chronic pulmonary conditions  
62 including bronchopulmonary dysplasia, sarcoidosis, and asthma.(6) The precise  
63 mechanism for *FABP4* downregulation in infection – or, alternatively, upregulation in non-  
64 infectious lung disease – remains unclear. From a diagnostic lens, a study of ventilator-  
65 associated pneumonia identified *FABP4* as one of the most downregulated proteins in  
66 TA, and a study of COPD patients noted decreased sputum *FABP4* protein levels in  
67 bacterial infection, supporting our transcriptomic findings at the protein level.(9,10)

68 Taken together, these results demonstrate that *FABP4* is a promising age-agnostic,  
69 inverse-biomarker for all-cause LRTI in two independent cohorts of critically ill, intubated  
70 patients. *FABP4* achieved high accuracy for LRTI diagnosis in both cohorts, with

71 performance exceeding those of existing clinical biomarkers(1,2) despite differing ages,  
72 microbiology, comorbidity burden, and preceding healthcare exposures. As host immune  
73 responses are more dynamic and informative at the site of infection, the identification of  
74 an accurate LRTI biomarker from respiratory fluid rather than peripheral blood, while  
75 novel, is perhaps not surprising. Diagnostically, *FABP4* could add value to standard TA  
76 culture, both in discriminating LRTI pathogens from colonizing microbes and in  
77 diagnosing LRTI when cultures are hindered by preceding antibiotics. In addition to  
78 improving LRTI diagnosis for the individual patient, a pan-pathogen host biomarker of  
79 LRTI could have utility for pandemic preparedness and infection control, enabling rapid  
80 screening, early isolation, and other prevention measures.

81         These preliminary findings require independent validation in additional cohorts with  
82 both transcriptomic and proteomic approaches. It remains unknown whether *FABP4* has  
83 diagnostic utility in non-critically ill patients, or when measured in more broadly accessible  
84 sample types, such as sputum, nasal swabs, or blood. To better understand the  
85 mechanism of *FABP4* modulation and to gauge whether particular cell types may mediate  
86 or confound *FABP4* expression, cytometry and single-cell RNA sequencing on lower  
87 respiratory tract samples from patients with LRTI, non-infectious respiratory syndromes,  
88 and healthy controls will be valuable. Lastly, an important step towards clinical translation  
89 will be development of RT-qPCR and/or lateral-flow protein assays. In sum, we find that  
90 pulmonary *FABP4* is a novel, downregulated biomarker of severe LRTI across the age  
91 spectrum, with promising utility in critically ill patients.

## 92 **References**

- 93 1. Self WH, Balk RA, Grijalva CG, Williams DJ, Zhu Y, Anderson EJ, *et al.* Procalcitonin  
94 as a Marker of Etiology in Adults Hospitalized With Community-Acquired Pneumonia.  
95 *Clin Infect Dis* 2017;65:183–190.
- 96 2. van der Meer V, Neven AK, van den Broek PJ, Assendelft WJJ. Diagnostic value of C  
97 reactive protein in infections of the lower respiratory tract: systematic review. *BMJ*  
98 2005;331:26.
- 99 3. Langelier C, Kalantar KL, Moazed F, Wilson MR, Crawford ED, Deiss T, *et al.*  
100 Integrating host response and unbiased microbe detection for lower respiratory tract  
101 infection diagnosis in critically ill adults. *Proc Natl Acad Sci U S A* 2018;115:E12353–  
102 E12362.
- 103 4. Mick E, Tsitsiklis A, Kamm J, Kalantar KL, Caldera S, Lyden A, *et al.* Integrated  
104 host/microbe metagenomics enables accurate lower respiratory tract infection diagnosis  
105 in critically ill children. *J Clin Invest* 2023;133:
- 106 5. Jain S, Williams DJ, Arnold SR, Ampofo K, Bramley AM, Reed C, *et al.* Community-  
107 Acquired Pneumonia Requiring Hospitalization among U.S. Children. *New England*  
108 *Journal of Medicine* 2015;372:835–845.
- 109 6. Furuhashi M, Saitoh S, Shimamoto K, Miura T. Fatty Acid-Binding Protein 4 (FABP4):  
110 Pathophysiological Insights and Potent Clinical Biomarker of Metabolic and  
111 Cardiovascular Diseases. *Clin Med Insights Cardiol* 2014;8s3:CMC.S17067.
- 112 7. Liao M, Liu Y, Yuan J, Wen Y, Xu G, Zhao J, *et al.* Single-cell landscape of  
113 bronchoalveolar immune cells in patients with COVID-19. *Nat Med* 2020;26:842–844.

- 114 8. Chen ST, Park MD, Del Valle DM, Buckup M, Tabachnikova A, Thompson RC, *et al.*  
115 A shift in lung macrophage composition is associated with COVID-19 severity and  
116 recovery. *Science Translational Medicine* 2022;14:eabn5168.
- 117 9. Pathak KV, McGilvrey MI, Hu CK, Garcia-Mansfield K, Lewandoski K, Eftekhari Z, *et*  
118 *al.* Molecular Profiling of Innate Immune Response Mechanisms in Ventilator-associated  
119 Pneumonia. *Mol Cell Proteomics* 2020;19:1688–1705.
- 120 10. Perea L, Rodrigo-Troyano A, Cantó E, Domínguez-Álvarez M, Giner J, Sanchez-  
121 Reus F, *et al.* Reduced airway levels of fatty-acid binding protein 4 in COPD:  
122 relationship with airway infection and disease severity. *Respir Res* 2020;21:21.

123

124

#### 125 **Data and Code Availability**

126 All data, code, and results are available at: [https://github.com/infectiousdisease-langelier-](https://github.com/infectiousdisease-langelier-lab/LRTI_FABP4_classifier)  
127 [lab/LRTI\\_FABP4\\_classifier](https://github.com/infectiousdisease-langelier-lab/LRTI_FABP4_classifier) for reviewing and reproducing the analyses.

128

#### 129 **Ethics Statement**

130 The pediatric cohort study was approved by the Collaborative Pediatric Critical Care  
131 Research IRB at the University of Utah (protocol #00088656). Informed consent was  
132 obtained from parents or other legal guardians. The adult cohort was approved by the  
133 University of California Institutional Review Board (protocol #10-02701) and informed  
134 consent was obtained from patients or surrogate decision makers.



## Tables

| Pediatric Cohort (n=261)                |               |                |         |                  |                      |
|-----------------------------------------|---------------|----------------|---------|------------------|----------------------|
|                                         | LRTI (n=117)  | No LRTI (n=50) | P value | Suspected (n=57) | Indeterminate (n=37) |
| Female, n (%)                           | 45 (38.5%)    | 25 (50.0%)     | 0.18    | 26 (45.6%)       | 16 (43.2%)           |
| Age, median (IQR)                       | 0.5 (0.2–1.8) | 6.5 (1.5–12.9) | <0.001* | 1.7 (0.6-6.0)    | 1.5 (0.6-10.8)       |
| Race                                    |               |                | 0.45    |                  |                      |
| White, n (%)                            | 69 (59.0%)    | 30 (60.0%)     |         | 33 (57.9%)       | 20 (54.1%)           |
| Black/African American, n (%)           | 26 (22.2%)    | 7 (14.0%)      |         | 11 (19.3%)       | 10 (27.0%)           |
| Asian, n (%)                            | 5 (4.3%)      | 6 (12.0%)      |         | 2 (3.5%)         | 2 (5.4%)             |
| American Indian/Alaska Native, n (%)    | 1 (0.9%)      | 1 (2.0%)       |         | 1 (1.8%)         | 0 (0.0%)             |
| Native Hawaiian/Pacific Islander, n (%) | 1 (0.9%)      | 0 (0.0%)       |         | 0 (0.0%)         | 0 (0.0%)             |
| Multi-racial, n (%)                     | 3 (2.6%)      | 1 (2.0%)       |         | 1 (1.8%)         | 1 (2.7%)             |
| Unknown/Other, n (%)                    | 12 (10.3%)    | 5 (10.0%)      |         | 9 (15.8%)        | 4 (10.8%)            |
| Hispanic/Latino, n (%)                  | 17 (14.5%)    | 6 (12.0%)      | 0.81    | 14 (24.6%)       | 7 (18.9%)            |
| Comorbidities, n (%)                    | 38 (32.5%)    | 26 (52.0%)     | 0.02*   | 34 (59.7%)       | 14 (37.8%)           |
| Immunosuppressed, n (%)                 | 3 (2.6%)      | 7 (14.0%)      | 0.01*   | 5 (8.8%)         | 6 (16.2%)            |
| Overweight/obese BMI, n (%)             | 30 (25.6%)    | 14 (28%)       | 0.84    | 17 (29.8%)       | 11 (29.7%)           |
| Renal dysfunction, n (%)                | 5 (4.3%)      | 8 (16.0%)      | 0.02*   | 6 (10.5%)        | 8 (21.6%)            |
| ARDS (Berlin Criteria), n (%)           | 30 (25.6%)    | 9 (18.0%)      | 0.32    | 23 (40.4%)       | 7 (18.9%)            |
| Antibiotics on day of enrollment        | 112 (95.7%)   | 42 (84.0%)     | 0.02*   | 51 (89.5%)       | 30 (69.8%)           |
| LRTI type                               |               |                |         |                  |                      |
| Bacterial, n (%)                        | 16 (13.6%)    |                |         |                  |                      |
| Viral, n (%)                            | 54 (46.2%)    |                |         |                  |                      |
| Fungal, n (%)                           | 0.0 (0.0%)    |                |         |                  |                      |
| Co-infection, n (%)                     | 47 (40.2%)    |                |         |                  |                      |

Table 1 (spans two pages; see caption below).

| Adult Cohort (n=202)                    |                  |                  |         |                  |                      |
|-----------------------------------------|------------------|------------------|---------|------------------|----------------------|
|                                         | LRTI (n=44)      | No LRTI (n=56)   | P value | Suspected (n=36) | Indeterminate (n=66) |
| Female, n (%)                           | 14 (31.8%)       | 31 (55%)         | 0.03*   | 8 (22.2%)        | 28 (42.4%)           |
| Age, median (IQR)                       | 63.5 (47.0-75.5) | 62.0 (52.0-70.0) | 0.75    | 67.0 (59.5-74.5) | 59 (47.0-70.0)       |
| Race                                    |                  |                  | 0.94    |                  |                      |
| White, n (%)                            | 23 (52.3%)       | 28 (50.0%)       |         | 20 (55.6%)       | 34 (51.5%)           |
| Black/African American, n (%)           | 4 (9.1%)         | 5 (8.9%)         |         | 1 (2.8%)         | 4 (6.1%)             |
| Asian, n (%)                            | 8 (18.2%)        | 12 (21.4%)       |         | 12 (33.3%)       | 9 (13.6%)            |
| American Indian/Alaska Native, n (%)    | 0 (0.0%)         | 0 (0.0%)         |         | 0 (0.0%)         | 1 (1.5%)             |
| Native Hawaiian/Pacific Islander, n (%) | 1 (2.2%)         | 0 (0.0%)         |         | 0 (0.0%)         | 2 (3.0%)             |
| Multi-racial, n (%)                     | 0 (0.0%)         | 0 (0.0%)         |         | 0 (0.0%)         | 0 (0.0%)             |
| Unknown/Other, n (%)                    | 8 (18.2%)        | 11 (19.6%)       |         | 3 (8.3%)         | 16 (24.2%)           |
| Hispanic/Latino, n (%)                  | 6 (13.6%)        | 12 (21.4%)       | 0.43    | 5 (13.9%)        | 18 (27.3%)           |
| Comorbidities, n (%)                    | 43 (97.7%)       | 52 (92.9%)       | 0.38    | 36 (100.0%)      | 59 (89.4%)           |
| Immunosuppressed, n (%)                 | 10 (22.7%)       | 7 (12.5%)        | 0.19    | 3 (8.3%)         | 9 (13.6%)            |
| Overweight/obese BMI, n (%)             | 23 (52.3%)       | 39 (69.6%)       | 0.10    | 17 (47.2%)       | 44 (66.7%)           |
| Renal dysfunction, n (%)                | 23 (52.3%)       | 34 (60.7%)       | 0.42    | 22 (61.1%)       | 39 (59.1%)           |
| ARDS (Berlin Criteria), n (%)           | 28 (63.6%)       | 8 (14.2%)        | <0.001* | 20 (55.6%)       | 25 (37.9%)           |
| Antibiotics on day of enrollment        | 38 (86.4%)       | 45 (80.3%)       | 0.59    | 36 (100.0%)      | 58 (87.9%)           |
| LRTI type                               |                  |                  |         |                  |                      |
| Bacterial, n (%)                        | 32 (72.7%)       |                  |         |                  |                      |
| Viral, n (%)                            | 6 (13.6%)        |                  |         |                  |                      |
| Fungal, n (%)                           | 1.0 (2.3%)       |                  |         |                  |                      |
| Co-infection, n (%)                     | 5 (11.4%)        |                  |         |                  |                      |

**Table 1: Demographic and clinical characteristics of the pediatric and adult cohorts.** Abnormal BMI was classified as  $>25 \text{ kg/m}^2$  for adults and  $>85^{\text{th}}$  percentile for children. Renal dysfunction was classified as creatinine above the upper limit of normal and/or need for renal replacement therapy while hospitalized. Mann-Whitney test was used for all continuous variables, and Fisher's exact test was used for all categorical values. Asterisk (\*) indicates  $p < 0.05$  between the Definite and No Evidence groups. ARDS, acute respiratory distress syndrome.

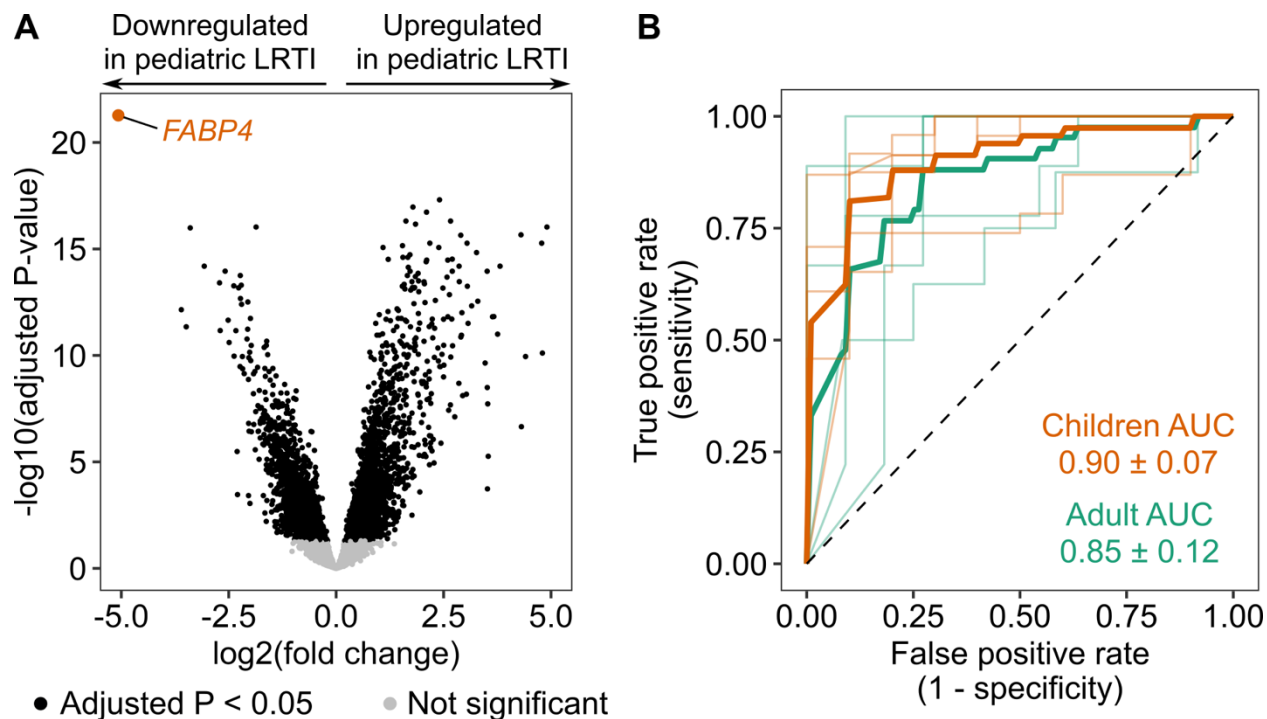

**Figure 1: *FABP4* performance in adult and pediatric cohorts.** (A) Volcano plot displaying differential expression of all genes quantified by RNA sequencing between Definite LRTI and No Evidence subjects within the pediatric cohort.  $\log_2(\text{fold change})$  is plotted against  $-\log_{10}(P_{\text{adj}})$  for each gene. Statistically significant genes ( $P_{\text{adj}} < 0.05$ ) are shown in black and non-significant genes are shown in grey. *FABP4* gene is highlighted in orange as highly downregulated in LRTI patients. (B) Receiver operating characteristic (ROC) curve demonstrating *FABP4* performance in diagnosing LRTI in the pediatric (orange) and adult (green) cohorts. The faded lines indicate results from each of the 5-fold validations on normalized *FABP4* gene counts. The area under the curve (AUC) is presented as mean  $\pm$  standard deviation.
